# Supplementary material for: Genome-Wide Identification of MicroRNAs in Leaves and the Developing Head of Four Durum Genotypes during Water Deficit Stress
Source: PLoS One. 2015 Nov 12;10(11):e0142799. doi: 10.1371/journal.pone.0142799 (PMC4643036; doi:10.1371/journal.pone.0142799)
Supplement: S4 Table — Fold changes have been determined by comparing the RPM between the control treatment libraries and the water deficit stress treatment libraries in the flag leaf and the developing head of four durum wheat genotypes. Fold changes are shown when greater than 1.5 fold. Green values indicate that miRNA reads were more abundant in the water deficit treatment libraries. Red values indicate that the miRNA reads were more abundant in the control treatment libraries. CG = Control group; WG = Water deficit stress group; FL = Flag leaf libraries; H = Head libraries; Be = EGA Bellaroi; Ta = Tamaroi; Tj = Tjilkuri; Ya = Yawa; Ath = Arabidopsis thaliana; Bdi = Brachypodium distachyon; Gma = Glycine max; Hvu = Hordeum vulgare; Osa = Oryza sativa; Sbi = Sorghum bicolor; Tae = Triticum aestivum; Zma = Zea mays. (XLS) [file pone.0142799.s007.xls]

## Sheet: Sheet1
S4 Table. Conserved water deficit stress responsive miRNAs in durum wheat.
			FL	FL	FL	FL	H	H	H	H
			EGA Bellaroi	Tjilkuri	Tamaroi	Yawa	EGA Bellaroi	Tjilkuri	Tamaroi	Yawa
Sequence	Name	Resource	WG/CG	WG/CG	WG/CG	WG/CG	WG/CG	WG/CG	WG/CG	WG/CG
TTGTCGCAGGTATGGATGTATCTA	MIR1136	Tae								1.54094
CTCAGGAGAGATGACACCGAC	MIR1432	Sbi		1.56778	1.66509
TGACAGAAGAGAGTGAGCAC	MIR156b	Ath								1.9742
GCTCACTGCTCTTCCTGTCATC	MIR156h	Bdi		1.61191		1.83116
TTGACAGAAGAGAGTGAGCAC	MIR156k	Gma								2.4436
TGACAGAAGAGAGTGAGCACT	MIR156q	Gma			1.66804
CTTGGATTGAAGGGAGCTCT	MIR159	Bdi								1.57565
TTTGGATTGAAGGGAGCTCTA	MIR159a	Ath								1.74992
TTTGGATTGAAGGGAGCTCCT	MIR159c	Ath					1.52794
CTTGGATTGAAGGGAGCTCCT	MIR159c	Zma		1.73881
TGCCTGGCTCCCTGTATGCCA	MIR160a	Ath					1.63202			2.45767
TGCCTGGCTCCCTGAATGCCA	MIR160f	Sbi					1.51492			2.81853
TGGAGAAGCAGGGCACGTGCA	MIR164	Tae					1.52656			1.73594
TGGAGAAGCAGGGCACGTGC	MIR164b	Gma					1.52896
GAATGACGCCGGGTCTGAAAG	MIR166a	Bdi				1.79105
TCGGACCAGGCTTCATTCCCC	MIR166b	Ath								1.57796
TCTCGGACCAGGCTTCATTCC	MIR166f	Bdi				2.04196
TCGGACCAGGCTTCATTCCC	MIR166h	Zma								1.68036
TCGGACCAGGCTTCATTCCCG	MIR166j	Gma	1.86781	3.39977			2.24565	3.39222		1.75549
TCGGACCAGGCTTCATTCCT	MIR166k	Sbi							1.56873
TCGGACCAGGCTTCATTCCTC	MIR166l	Zma								1.91075
GGAATGTTGGCTGGCTCGAGG	MIR166m	Zma			1.90249
GATCATGCATGACAGCCTCATT	MIR167a	Zma								2.08445
TGAAGCTGCCAGCATGATCTA	MIR167b	Zma								2.31359
TGAAGCTGCCAGCATGATCTGG	MIR167d	Ath		2.63258	1.53507			2.73624		1.51098
AGGTCATGCTGGAGTTTCATC	MIR167e	Bdi	1.68056				1.50756			1.70992
AGATCATGTTGCAGCTTCACT	MIR167e	Osa			1.57462
TGAAGCTGCCAGCATGATCTG	MIR167e	Zma								1.80806
TGAAGCTGCCAGCATGATCTGA	MIR167g	Gma								1.69406
GATCATGTGGCAGTTTCATT	MIR167j	Zma	1.53955
CCCGCCTTGCACCAAGTGAAT	MIR168	Bdi				2.13854	2.3467		1.53832	3.0038
TCGCTTGGTGCAGATCGGGAC	MIR168	Sbi								1.97867
TGTTGGCTCGACTCACTCAGA	MIR171d	Bdi								1.57865
TGTTGGCTCGGCTCACTCAGA	MIR171d	Zma								1.62435
TTGGACTGAAGGGAGCTCCCT	MIR319b	Ath	1.55467							1.52066
TCAGTGCAATCCCTTTGGAAT	MIR393b	Osa	1.60011							1.90929
TTCCAAAGGGATCGCATTGATC	MIR393h	Gma								2.02615
TTGGCATTCTGTCCACCTCC	MIR394	Bdi	1.91325				1.86684			2.00081
TGAAGTGTTTGGGGGAACTC	MIR395b	Tae			2.2177		10.393		7.68493	4.14985
TCCACAGGCTTTCTTGAACTG	MIR396a	Bdi								1.70491
TTCCACAGCTTTCTTGAACTT	MIR396b	Ath							1.51528	2.33662
TTCCACAGCTTTCTTGAACTG	MIR396d	Bdi								2.02292
TCCACAGGCTTTCTTGAACGG	MIR396g	Osa	2.99282	1.73732
TCACCGGCGCTGCACTCAATT	MIR397	Sbi	1.53265	1.76712		1.50394
ATTGAGTGCAGCGTTGATGAA	MIR397b	Bdi		2.02918		1.91766	2.03265		2.02779	1.5256
TGTGTTCTCAGGTCGCCCCCG	MIR398b	Zma	3.18325				5.02448		2.72876	3.05394
TGCCAAAGGAGAATTGCCCTG	MIR399c	Zma	2.82198	2.23407		1.79961				5.38095
TGCCAAAGGAGAGTTGCCCTG	MIR399e	Zma				1.75616	1.53151		1.97676	4.15571
CTGCACTGCCTCTTCCCTGGC	MIR408	Tae		1.59432	1.57417	2.69887			5.20388
TGCACTGCCTCTTCCCTGGC	MIR408d	Gma	4.3297	1.6316		2.29337	8.81004		5.1643	1.52605
TGTTGTCTCAAGCTTGCTGCC	MIR444b	Osa				1.81836				2.55907
TATTTGCAGGTTTTAGGTCTAA	MIR5048a	Hvu			1.58227					2.04868
AGACAATTATTTTGGGACGGAGG	MIR5049c	Hvu								1.55375
TACAATTATTTAGGAACGGAG	MIR5049d	Hvu					1.5246			2.26874
TCCCCACGGTCGGCGCCA	MIR5054	Bdi			1.56415	2.29221				1.57445
TCAAGCATCATATCGTGGACA	MIR5071	Osa					1.51375			1.96497
GTTCGCGTCGGGTTCACCA	MIR5077	Osa	1.59829			1.66259				1.67377
TGTAGATACTCTCTAAGGCTT	MIR5200	Bdi	2.7677	13.8222		1.51118	2.85264	7.76563	1.54388	3.1281
CCTGTGCCTGCCTCTTCCATT	MIR528	Bdi	8.56791	1.68749	5.53484	1.71539			2.23746
TGGAAGGGGCATGCAGAGGAG	MIR528a	Zma	2.84663	1.52799			3.58726		5.10614	2.7478
GGACAGTCTCAGGTAGACA	MIR5368	Gma				1.8903
TAGATTTGTCTAGATATGAA	MIR6191	Hvu								1.93817
GTCGTTGTAGTATAGTGG	MIR6300	Gma		7.05695			1.77383		3.07461
CACAAAACCTTCAGCTACCCA	MIR7757	Bdi			1.50627					3.36181
TTTTGTTGGTTGTCATCTAACC	MIR827-5p	Bdi	1.76796
TTAGATGACCATCAGCAAACA	MIR827-3p	Bdi	1.89545			1.92
